# Supplementary material
Source: PubMed Central journal article supplement (PMC9680195)
Supplement: NIHMS1850264-supplement-Supplemental_Table_7_Deleted_Developmental_Milestones.pdf [file NIHMS1850264-supplement-Supplemental_Table_7_Deleted_Developmental_Milestones.pdf]

## Supplemental Information

**SUPPLEMENTAL TABLE 7** Deleted Developmental Milestones for the CDC *Learn the Signs. Act Early.* Program

| Checklist | Age   | Deleted Developmental Milestones                                                                   | Reasons Removed <sup>a</sup> |
|-----------|-------|----------------------------------------------------------------------------------------------------|------------------------------|
| 1         | 2 mo  | Can briefly calm himself (may bring hands to mouth and suck on hand)                               | 1, 4                         |
| 2         | 2 mo  | Begins to act bored (cries or fussy) if activity does not change                                   | 1, 4                         |
| 3         | 2 mo  | Makes smoother movements with arms and legs                                                        | 1                            |
| 4         | 4 mo  | Copies some movements and facial expressions, like smiling or frowning                             | 1                            |
| 5         | 4 mo  | Begins to babble                                                                                   | 4                            |
| 6         | 4 mo  | Babbles with expression and copies sounds he hears                                                 | 1, 4                         |
| 7         | 4 mo  | Cries in different ways to show hunger, pain, or being tired                                       | 1                            |
| 8         | 4 mo  | Lets you know if she is happy or sad                                                               | 4                            |
| 9         | 4 mo  | Responds to affection                                                                              | 4                            |
| 10        | 4 mo  | Reaches for toy with one hand                                                                      | 3                            |
| 11        | 4 mo  | Watches faces closely                                                                              | 3                            |
| 12        | 4 mo  | Follows moving things with eyes from side to side                                                  | 4                            |
| 13        | 4 mo  | Recognizes familiar people and things at a distance                                                | 3                            |
| 14        | 4 mo  | Pushes down on legs when feet are on a hard surface                                                | 1, 4                         |
| 15        | 6 mo  | Likes to play with others, especially parents                                                      | 3                            |
| 16        | 6 mo  | Responds to other people's emotions and often seems happy                                          | 3                            |
| 17        | 6 mo  | Strings vowels together when babbling (ah, eh, oh) and takes turns with parent while making sounds | 3, 4                         |
| 18        | 6 mo  | Makes sounds to show joy and displeasure                                                           | 4                            |
| 19        | 6 mo  | Begins to say consonant sounds (jabbering with m and b)                                            | 4                            |
| 20        | 6 mo  | Begins to pass things from one hand to another                                                     | 3, 4                         |
| 21        | 6 mo  | Rolls over in both directions (front to back, back to front)                                       | 2                            |
| 22        | 6 mo  | When standing, supports weight on legs and might bounce                                            | 1                            |
| 23        | 6 mo  | Rocks back and forth, sometimes crawling backward before moving forward                            | 1                            |
| 24        | 9 mo  | Has favorite toys                                                                                  | 1                            |
| 25        | 9 mo  | Copies sounds and gestures of others                                                               | 3, 4                         |
| 26        | 9 mo  | Uses fingers to point at things                                                                    | 3                            |
| 27        | 9 mo  | Watches the path of something as it falls                                                          | 1                            |
| 28        | 9 mo  | Puts things in her mouth                                                                           | 3                            |
| 29        | 9 mo  | Stands, holding on                                                                                 | 2                            |
| 30        | 9 mo  | Pulls to stand                                                                                     | 3                            |
| 31        | 9 mo  | Crawls                                                                                             | 1                            |
| 32        | 12 mo | Is shy or nervous with strangers                                                                   | 3                            |
| 33        | 12 mo | Has favorite things and people                                                                     | 1                            |
| 34        | 12 mo | Shows fear in some situations                                                                      | 3                            |
| 35        | 12 mo | Hands you a book when he wants to hear a story                                                     | 1                            |
| 36        | 12 mo | Repeats sounds or actions to get attention                                                         | 4                            |
| 37        | 12 mo | Plays games such as peek-a-boo and pat-a-cake                                                      | 3                            |
| 38        | 12 mo | Makes sounds with changes in tone (sounds more like speech)                                        | 1, 4                         |
| 39        | 12 mo | Says "mama" and "dada" and exclamations like "uh-oh!"                                              | 1                            |
| 40        | 12 mo | Tries to say words you say                                                                         | 1, 4                         |
| 41        | 12 mo | Explores things in different ways, like shaking, banging, throwing                                 | 1                            |
| 42        | 12 mo | Finds hidden things easily                                                                         | 4                            |
| 43        | 12 mo | Copies gestures                                                                                    | 4                            |
| 44        | 12 mo | Lets things go without help                                                                        | 1, 4                         |
| 45        | 12 mo | Pokes with index (pointer) finger                                                                  | 1, 4                         |
| 46        | 12 mo | Follows simple instructions, like "Pick up the toy."                                               | 3                            |
| 47        | 12 mo | Gets to a sitting position without help                                                            | 3                            |
| 48        | 12 mo | May stand alone                                                                                    | 4                            |
| 49        | 18 mo | Likes to hand things to others as play                                                             | 1                            |
| 50        | 18 mo | May have temper tantrums                                                                           | 1, 4                         |
| 51        | 18 mo | May be afraid of strangers                                                                         | 3, 4                         |
| 52        | 18 mo | May cling to caregivers in new situations                                                          | 3, 4                         |
| 53        | 18 mo | Says and shakes head no                                                                            | 2                            |
| 54        | 18 mo | Knows what ordinary things are for, for example, telephone, brush, spoon                           | 3                            |
| 55        | 18 mo | Shows interest in a doll or stuffed animal by pretending to feed                                   | 4                            |
| 56        | 18 mo | Points to 1 body part                                                                              | 1                            |
| 57        | 18 mo | Pulls toys while walking                                                                           | 1                            |

**SUPPLEMENTAL TABLE 7** Continued

| Checklist | Age   | Deleted Developmental Milestones                                                                            | Reasons Removed <sup>a</sup> |
|-----------|-------|-------------------------------------------------------------------------------------------------------------|------------------------------|
| 58        | 24 mo | Gets excited when with other children                                                                       | 1, 4                         |
| 59        | 24 mo | Shows more and more independence                                                                            | 1, 4                         |
| 60        | 24 mo | Shows defiant behavior (doing what he has been told not to)                                                 | 1, 4                         |
| 61        | 24 mo | Repeats words overheard in a conversation                                                                   | 1                            |
| 62        | 24 mo | Points to things in a book                                                                                  | 4                            |
| 63        | 24 mo | Finds things even when hidden under 2 or 3 covers                                                           | 1, 4                         |
| 64        | 24 mo | Begins to sort shapes and colors                                                                            | 1, 4                         |
| 65        | 24 mo | Completes sentences and rhymes in familiar books                                                            | 1                            |
| 66        | 24 mo | Plays simple make-believe                                                                                   | 3, 4                         |
| 67        | 24 mo | Builds towers of 4 or more blocks                                                                           | 4                            |
| 68        | 24 mo | Might use one hand more than the other                                                                      | 1, 4                         |
| 69        | 24 mo | Stands on tiptoe                                                                                            | 1                            |
| 70        | 24 mo | Walks up and down stairs holding on                                                                         | 2                            |
| 71        | 24 mo | Throws ball overhand                                                                                        | 2, 4                         |
| 72        | 24 mo | Makes or copies straight lines and circles                                                                  | 2                            |
| 73        | 3 y   | Copies adults and friends                                                                                   | 3                            |
| 74        | 3 y   | Shows affection for friends without prompting                                                               | 1                            |
| 75        | 3 y   | Understands the idea of mine and his and hers                                                               | 1                            |
| 76        | 3 y   | Shows a wide range of emotions                                                                              | 1, 4                         |
| 77        | 3 y   | May get upset with major changes in routine                                                                 | 1, 4                         |
| 78        | 3 y   | Follows instructions with 2 or 3 steps                                                                      | 4                            |
| 79        | 3 y   | Can name most familiar things                                                                               | 4                            |
| 80        | 3 y   | Understands words like in, on, and under                                                                    | 1, 4                         |
| 81        | 3 y   | Names a friend                                                                                              | 1                            |
| 82        | 3 y   | Plays make-believe with dolls, animals, and people                                                          | 3                            |
| 83        | 3 y   | Does a puzzle with 3 or 4 pieces                                                                            | 2, 4                         |
| 84        | 3 y   | Understands what "two" means                                                                                | 1, 4                         |
| 85        | 3 y   | Builds a tower of more than 6 blocks                                                                        | 1, 4                         |
| 86        | 3 y   | Climbs well                                                                                                 | 4                            |
| 87        | 3 y   | Runs easily                                                                                                 | 3, 4                         |
| 88        | 3 y   | Pedals a tricycle (3-wheel bike)                                                                            | 1, 4                         |
| 89        | 3 y   | Walks up and down stairs, one foot on each step                                                             | 1, 4                         |
| 90        | 4 y   | Enjoys doing new things                                                                                     | 1                            |
| 91        | 4 y   | Is more and more creative with make-believe play                                                            | 4                            |
| 92        | 4 y   | Cooperates with other children                                                                              | 4                            |
| 93        | 4 y   | Often cannot tell what is real and what is make-believe                                                     | 1, 4                         |
| 94        | 4 y   | Talks about what she likes and what she is interested in                                                    | 1                            |
| 95        | 4 y   | Knows some basic rules of grammar, such as correctly using he and she                                       | 2, 4                         |
| 96        | 4 y   | Tells stories                                                                                               | 3                            |
| 97        | 4 y   | Can say first and last name                                                                                 | 3                            |
| 98        | 4 y   | Understands the idea of counting                                                                            | 1, 4                         |
| 99        | 4 y   | Understands the idea of same and different                                                                  | 1, 4                         |
| 100       | 4 y   | Uses scissors                                                                                               | 2, 4                         |
| 101       | 4 y   | Starts to copy some capital letters                                                                         | 4                            |
| 102       | 4 y   | Plays board or card games                                                                                   | 1                            |
| 103       | 4 y   | Tells you what he thinks is going to happen next in a book                                                  | 4                            |
| 104       | 4 y   | Pours, cuts with supervision, and mashes own food                                                           | 1                            |
| 105       | 5 y   | Wants to please friends                                                                                     | 4                            |
| 106       | 5 y   | Wants to be like friends                                                                                    | 4                            |
| 107       | 5 y   | Is aware of gender                                                                                          | 4                            |
| 108       | 5 y   | Can tell what is real and what is make-believe                                                              | 1, 4                         |
| 109       | 5 y   | Shows more independence (eg, may visit a next-door neighbor by himself [adult supervision is still needed]) | 1, 4                         |
| 110       | 5 y   | Is sometimes demanding and sometimes very cooperative                                                       | 1, 4                         |
| 111       | 5 y   | Speaks very clearly                                                                                         | 3                            |
| 112       | 5 y   | Uses future tense; for example, "Grandma will be here."                                                     | 1                            |
| 113       | 5 y   | Says name and address                                                                                       | 1                            |
| 114       | 5 y   | Can draw a person with at least 6 body parts                                                                | 2                            |
| 115       | 5 y   | Copies a triangle and other geometric shapes                                                                | 2, 4                         |
| 116       | 5 y   | Knows about things used every day, like money and food                                                      | 1, 4                         |
| 117       | 5 y   | Stands on one foot for 10 s or longer                                                                       | 1, 4                         |

**SUPPLEMENTAL TABLE 7** Continued

| Checklist Age |     | Deleted Developmental Milestones                  | Reasons Removed <sup>a</sup> |
|---------------|-----|---------------------------------------------------|------------------------------|
| 118           | 5 y | Hops; may be able to skip                         | 1, 4                         |
| 119           | 5 y | Can do a somersault                               | 1, 4                         |
| 120           | 5 y | Uses a fork and spoon and sometimes a table knife | 1, 4                         |
| 121           | 5 y | Can use the toilet on her own                     | 2, 4                         |
| 122           | 5 y | Swings and climbs                                 | 1, 4                         |

<sup>a</sup> Key: 1 = little/no normative data regarding when the milestone/part of the milestone should be achieved by  $\geq 75\%$  of children; 2 = inconsistent data regarding when the milestone/part of the milestone should be achieved by  $\geq 75\%$  of children; 3 = duplicate milestone at earlier or later age; 4 = did not meet other criteria established by SMEs (see Table 1 for criteria).
